# Supplementary material for: Massive expansion of sex-specific SNPs, transposon-related elements, and neocentromere formation shape the young W-chromosome from the mosquitofish Gambusia affinis
Source: PubMed Central journal article supplement (PMC10186657; doi:10.1186/s12915-023-01607-0), 2023-05-15
Supplement: 12915_2023_1607_MOESM5_ESM.pdf [file 12915_2023_1607_MOESM5_ESM.pdf]

**Supplementary Table 1: Gene duplications on the W chromosome compared to Z**

| gene identification on Z |                    |                        | copy number on W | Aliases description                                        |
|--------------------------|--------------------|------------------------|------------------|------------------------------------------------------------|
| query                    | alignment coverage | percentage of identity |                  |                                                            |
| XP_005798978.1           | 100                | 99,33                  | 3                | tubulin alpha-1B chain                                     |
| XP_023187410.1           | 100                | 95,73                  | 2                | RNA binding motif protein 10                               |
| XP_023186262.1           | 100                | 96,58                  | 2                | procollagen-lysine, 2-oxoglutarate 5-dioxygenase 1a        |
| XP_005801475.1           | 100                | 90,11                  | 2                | RIB43A domain with coiled-coils 1                          |
| XP_023197040.1           | 100                | 97,08                  | 2                | polyhomeotic homolog 2a (Drosophila)                       |
| XP_023197622.1           | 100                | 92,49                  | 2                | forkhead box protein P3-like                               |
| XP_005808727.1           | 100                | 96,34                  | 2                | potassium voltage-gated channel subfamily A member 10-like |
| XP_008411034.1           | 100                | 96,46                  | 2                | solute carrier family 35 member C2                         |
| XP_008411025.1           | 100                | 99,2                   | 2                | TATA-box binding protein associated factor 13              |
| XP_005808712.1           | 98,89              | 90,06                  | 2                | leucine rich repeat containing 23                          |
| XP_005800223.1           | 100                | 95,87                  | 2                | choline dehydrogenase                                      |
| XP_005808725.1           | 100                | 95,31                  | 2                | ETS variant transcription factor 7                         |
| XP_017161451.1           | 92,57              | 99,07                  | 2                | nuclear transcription factor Y, alpha, like                |
| XP_008411189.1           | 100                | 97,23                  | 2                | mitofusin 2                                                |
| XP_023197455.1           | 100                | 97,86                  | 2                | zinc finger protein PLAG1-like                             |
| XP_005808731.1           | 100                | 96,53                  | 2                | ubiquitin specific peptidase 21                            |
| XP_005815856.1           | 100                | 94,48                  | 3                | LAS1 like ribosome biogenesis factor                       |
| XP_014327841.1           | 100                | 86,67                  | 2                | patatin-like phospholipase domain-containing protein 2     |
| XP_014326788.1           | 95,93              | 95,41                  | 2                | myelin transcription factor 1-like                         |
| XP_023191973.1           | 96,39              | 97,29                  | 2                | TBC1 domain family, member 22B                             |
| XP_005804892.3           | 100                | 95,44                  | 2                | thiamin pyrophosphokinase 2                                |

**Supplementary Table 2: micro-RNA, long noncoding RNA and repeat content of the *amt* locus** (<http://www.mirbase.org>, <https://www.girinst.org> <https://macentral.org>, <http://www.noncode.org/>, <http://www.fishtedb.org>)

| name                                                                                                             | type          | <i>amt</i> region | <i>amt</i> position nt | source               | FISH (probe) |
|------------------------------------------------------------------------------------------------------------------|---------------|-------------------|------------------------|----------------------|--------------|
| Exon 1                                                                                                           |               |                   | 1-74                   | Lamatsch et al. 2015 | - (E)        |
| Harbinger-N174_Croc                                                                                              | TE            | exon 1            | 24-67                  | rebase               | - (E)        |
| miR-301                                                                                                          | Micro-RNA     | Intron 1          | 134-155                | mirbase              | - (E)        |
| (T) <sub>3</sub> GTC(T) <sub>7</sub> AA(T) <sub>3</sub> A(T) <sub>5</sub> W(T) <sub>5</sub> AG(T) <sub>4</sub> C | Simple repeat | Intron 1          | 251-289                | repeatmasker         | - (E)        |

|                                                                                                                                                              |               |                       |            |                      |           |
|--------------------------------------------------------------------------------------------------------------------------------------------------------------|---------------|-----------------------|------------|----------------------|-----------|
| Exon 2                                                                                                                                                       |               |                       | 1517-1324  | Lamatsch et al. 2015 | - (E)     |
| Exon 3                                                                                                                                                       |               |                       | 1451-1531  | Lamatsch et al. 2015 | n.d.      |
| hAT-N145_DR                                                                                                                                                  | TE            | Intron 3              | 1896- 1985 | repbase              | + (D/hAT) |
| Amazon_molly_rnd-4_family-1248#DNA/hAT-Charlie                                                                                                               | TE            | Intron 3              | 2040-2395  | FishTEDB             | + (D)     |
| miR-19                                                                                                                                                       | Micro-RNA     | Intron 3              | 2159-2185  | mirbase              | + (D)     |
| Gypsy-9_OD-I                                                                                                                                                 | TE            | Intron 3              | 2266-2327  | repbase              | + (D)     |
| <i>H. sapiens</i> NONHSAT070712                                                                                                                              | lncRNA        | Intron 3-<br>Exon 4   | 2607-2919  | RNAcentral           | + (D/H)   |
| Exon 4                                                                                                                                                       |               |                       | 2684-2849  | Lamatsch et al. 2015 | + (H)     |
| (TG) <sub>11</sub> YGYG(TG) <sub>3</sub> YG(TG) <sub>3</sub>                                                                                                 | Simple repeat | Intron 4              | 2873-2917  | repeatmasker         | - (C)     |
| <i>H. sapiens</i> Inc-C15orf59-1:3<br><i>H. sapiens</i> Inc-ZNF705D-2:19<br><i>H. sapiens</i> Inc-C6orf112-6:1<br><i>M. musculus</i><br>OTTMUST00000023722.1 | lncRNA        | Intron 4-<br>Intron 5 | 2920-3046  | RNAcentral           | - (C)     |
| Exon 5                                                                                                                                                       |               |                       | 2930-3007  | Lamatsch et al. 2015 | - (C)     |
| Exon 6                                                                                                                                                       |               |                       | 3168-3316  | Lamatsch et al. 2015 | + (R/G)   |
| Gypsy-14_GA-I                                                                                                                                                | TE            | Exon 6                | 3177- 3236 | repbase              | + (R/G)   |
| TC1_PP                                                                                                                                                       | TE            | Intron 6              | 3783-3994  | repbase              | - (TC1)   |
| (TCTG) <sub>3</sub>                                                                                                                                          | Simple repeat | Intron 6              | 4073-4093  | repeatmasker         | + (G)     |
| Helitron-like-4a_Hmel:                                                                                                                                       | TE            | Intron 6              | 4065- 4097 | repbase              | + (G)     |
| Exon 7                                                                                                                                                       |               |                       | 4103-4283  | Lamatsch et al. 2015 | + (P/B)   |
| <i>H. sapiens</i> NONHSAT097211                                                                                                                              | lncRNA        | Exon 7                | 4148-4285  | RNAcentral           | + (P/B)   |

|                                 |           |              |            |                      |         |
|---------------------------------|-----------|--------------|------------|----------------------|---------|
| Exon 8                          |           |              | 4444-4599  | Lamatsch et al. 2015 | - (F/O) |
| <i>H. sapiens</i> NONHSAT097211 | lncRNA    | Exon 9       | 5089-5262  | RNAcentral           | - (F/A) |
| Exon 9                          |           |              | 5094-5270  | Lamatsch et al. 2015 | - (F/A) |
| miR-103                         | Micro-RNA | Intron 9 UTR | 5445-5460  | mirbase              | - (A)   |
| SINE2-1_DL                      | TE        | Intron 9 UTR | 5627- 5774 | repbase              | - (A)   |
| DNA-8-3_HM                      | TE        | Intron 9 UTR | 6203- 6255 | repbase              | + (M)   |
